# Supplementary material
Source: publisher figshare collection journal article supplement (https://gsajournals.figshare.com/articles/dataset/_/7302002)
Supplement: Supplementary file 2 [file 1]

CPUXC{ }AO@AO[ { æÜ^& ç^i^Áq ^Áææ

Anova Table (Type III tests)

Response: CCRT

|                        | Sum Sq    | Df  | F value   | Pr(>F)        |
|------------------------|-----------|-----|-----------|---------------|
| (Intercept)            | 632510037 | 1   | 2451.1167 | < 2.2e-16 *** |
| Genotype               | 2655087   | 1   | 10.2891   | 0.001596 **   |
| Treatment              | 95128239  | 3   | 122.8810  | < 2.2e-16 *** |
| Sex                    | 2036796   | 1   | 7.8930    | 0.005537 **   |
| Genotype:Treatment     | 681154    | 3   | 0.8799    | 0.452748      |
| Treatment:Sex          | 1774903   | 3   | 2.2927    | 0.079824 .    |
| Genotype:Sex           | 85239     | 1   | 0.3303    | 0.566223      |
| Genotype:Treatment:Sex | 934548    | 3   | 1.2072    | 0.308729      |
| Residuals              | 44384557  | 172 |           |               |

---  
Signif. codes: 0 '\*\*\*' 0.001 '\*\*' 0.01 '\*' 0.05 '.' 0.1 ' ' 1  
> summary(model)

Call:

```
lm(formula = CCRT ~ Genotype + Treatment + Sex + Treatment *  
    Genotype + Treatment * Sex + Genotype * Sex + Genotype *  
    Sex * Treatment, data = my_MFdata)
```

Residuals:

| Min      | 1Q      | Median | 3Q     | Max     |
|----------|---------|--------|--------|---------|
| -1231.50 | -283.81 | -89.67 | 197.59 | 2497.50 |

Coefficients:

|                           | Estimate | Std. Error | t value | Pr(> t )     |
|---------------------------|----------|------------|---------|--------------|
| (Intercept)               | 1835.54  | 37.07      | 49.509  | < 2e-16 ***  |
| Genotype1                 | -118.92  | 37.07      | -3.208  | 0.00160 **   |
| Treatment1                | -877.71  | 64.22      | -13.668 | < 2e-16 ***  |
| Treatment2                | -434.31  | 63.74      | -6.814  | 1.53e-10 *** |
| Treatment3                | 335.51   | 64.69      | 5.186   | 5.97e-07 *** |
| Sex1                      | -104.16  | 37.07      | -2.809  | 0.00554 **   |
| Genotype1:Treatment1      | 14.55    | 64.22      | 0.227   | 0.82106      |
| Genotype1:Treatment2      | -69.14   | 63.74      | -1.085  | 0.27956      |
| Genotype1:Treatment3      | 90.96    | 64.69      | 1.406   | 0.16151      |
| Treatment1:Sex1           | 86.29    | 64.22      | 1.344   | 0.18081      |
| Treatment2:Sex1           | 107.43   | 63.74      | 1.686   | 0.09370 .    |
| Treatment3:Sex1           | -100.79  | 64.69      | -1.558  | 0.12104      |
| Genotype1:Sex1            | -21.31   | 37.07      | -0.575  | 0.56622      |
| Genotype1:Treatment1:Sex1 | 80.73    | 64.22      | 1.257   | 0.21042      |
| Genotype1:Treatment2:Sex1 | 18.54    | 63.74      | 0.291   | 0.77153      |
| Genotype1:Treatment3:Sex1 | 14.09    | 64.69      | 0.218   | 0.82781      |

---  
Signif. codes: 0 '\*\*\*' 0.001 '\*\*' 0.01 '\*' 0.05 '.' 0.1 ' ' 1

Residual standard error: 508 on 172 degrees of freedom

Multiple R-squared: 0.6995, Adjusted R-squared: 0.6733

F-statistic: 26.7 on 15 and 172 DF, p-value: < 2.2e-16

## ANOVA on Ranked Chill Coma Recovery Time data

Anova Table (Type III tests)

Response: CCRT\_rk

|                        | Sum Sq  | Df  | F value   | Pr(>F)        |
|------------------------|---------|-----|-----------|---------------|
| (Intercept)            | 1680767 | 1   | 2319.8063 | < 2.2e-16 *** |
| Genotype               | 14832   | 1   | 20.4711   | 1.125e-05 *** |
| Treatment              | 398980  | 3   | 183.5581  | < 2.2e-16 *** |
| Sex                    | 5589    | 1   | 7.7138    | 0.006088 **   |
| Genotype:Treatment     | 4208    | 3   | 1.9360    | 0.125590      |
| Treatment:Sex          | 3212    | 3   | 1.4778    | 0.222319      |
| Genotype:Sex           | 3       | 1   | 0.0043    | 0.947711      |
| Genotype:Treatment:Sex | 2355    | 3   | 1.0834    | 0.357621      |
| Residuals              | 124619  | 172 |           |               |

---  
Signif. codes: 0 '\*\*\*' 0.001 '\*\*' 0.01 '\*' 0.05 '.' 0.1 ' ' 1  
> summary(model)

Call:

```
lm(formula = CCRT_rk ~ Genotype + Treatment + Sex + Treatment *  
    Genotype + Treatment * Sex + Genotype * Sex + Genotype *  
    Sex * Treatment, data = my_MFdata)
```

Residuals:

| Min     | 1Q      | Median | 3Q     | Max     |
|---------|---------|--------|--------|---------|
| -54.333 | -15.917 | -3.583 | 15.330 | 102.458 |

Coefficients:

|                           | Estimate | Std. Error | t value | Pr(> t )     |
|---------------------------|----------|------------|---------|--------------|
| (Intercept)               | 94.6200  | 1.9645     | 48.164  | < 2e-16 ***  |
| Genotype1                 | -8.8885  | 1.9645     | -4.525  | 1.13e-05 *** |
| Treatment1                | -61.8530 | 3.4027     | -18.178 | < 2e-16 ***  |
| Treatment2                | -23.6721 | 3.3774     | -7.009  | 5.23e-11 *** |
| Treatment3                | 27.5694  | 3.4278     | 8.043   | 1.36e-13 *** |
| Sex1                      | -5.4562  | 1.9645     | -2.777  | 0.00609 **   |
| Genotype1:Treatment1      | -0.6361  | 3.4027     | -0.187  | 0.85192      |
| Genotype1:Treatment2      | -6.4553  | 3.3774     | -1.911  | 0.05762 .    |
| Genotype1:Treatment3      | 6.9036   | 3.4278     | 2.014   | 0.04556 *    |
| Treatment1:Sex1           | 3.0433   | 3.4027     | 0.894   | 0.37236      |
| Treatment2:Sex1           | 4.9458   | 3.3774     | 1.464   | 0.14491      |
| Treatment3:Sex1           | -5.1877  | 3.4278     | -1.513  | 0.13200      |
| Genotype1:Sex1            | 0.1290   | 1.9645     | 0.066   | 0.94771      |
| Genotype1:Treatment1:Sex1 | 5.2081   | 3.4027     | 1.531   | 0.12771      |
| Genotype1:Treatment2:Sex1 | -0.6811  | 3.3774     | -0.202  | 0.84041      |
| Genotype1:Treatment3:Sex1 | 0.2195   | 3.4278     | 0.064   | 0.94903      |

---  
Signif. codes: 0 '\*\*\*' 0.001 '\*\*' 0.01 '\*' 0.05 '.' 0.1 ' ' 1

Residual standard error: 26.92 on 172 degrees of freedom

Multiple R-squared: 0.7749, Adjusted R-squared: 0.7553

F-statistic: 39.48 on 15 and 172 DF, p-value: < 2.2e-16

## ANOVA on Ranked UV Sensitivity data

Anova Table (Type III tests)

Response: `UVSI_rk`

|                    | Sum Sq  | Df  | F value   | Pr(>F)        |
|--------------------|---------|-----|-----------|---------------|
| (Intercept)        | 3853058 | 1   | 1525.2621 | < 2.2e-16 *** |
| Genotype           | 19963   | 1   | 7.9025    | 0.005357 **   |
| Treatment          | 519953  | 3   | 68.6092   | < 2.2e-16 *** |
| Genotype:Treatment | 7592    | 3   | 1.0018    | 0.392778      |
| Residuals          | 588596  | 233 |           |               |

---

Signif. codes: 0 '\*\*\*' 0.001 '\*\*' 0.01 '\*' 0.05 '.' 0.1 ' ' 1  
> summary(model)

Call:

```
lm(formula = UVSI_rk ~ Genotype + Treatment + Genotype * Treatment,  
    data = my_UVdata)
```

Residuals:

| Min     | 1Q     | Median | 3Q    | Max    |
|---------|--------|--------|-------|--------|
| -101.72 | -37.58 | -2.70  | 31.26 | 148.41 |

Coefficients:

|                      | Estimate | Std. Error | t value | Pr(> t )     |
|----------------------|----------|------------|---------|--------------|
| (Intercept)          | 134.625  | 3.447      | 39.055  | < 2e-16 ***  |
| Genotype1            | -9.690   | 3.447      | -2.811  | 0.00536 **   |
| Treatment1           | 74.479   | 6.375      | 11.682  | < 2e-16 ***  |
| Treatment2           | 5.396    | 6.492      | 0.831   | 0.40675      |
| Treatment3           | -25.894  | 5.891      | -4.396  | 1.68e-05 *** |
| Genotype1:Treatment1 | 8.218    | 6.375      | 1.289   | 0.19870      |
| Genotype1:Treatment2 | 2.947    | 6.492      | 0.454   | 0.65034      |
| Genotype1:Treatment3 | -5.299   | 5.891      | -0.900  | 0.36930      |

---

Signif. codes: 0 '\*\*\*' 0.001 '\*\*' 0.01 '\*' 0.05 '.' 0.1 ' ' 1

Residual standard error: 50.26 on 233 degrees of freedom

Multiple R-squared: 0.495, Adjusted R-squared: 0.4798

F-statistic: 32.62 on 7 and 233 DF, p-value: < 2.2e-16

## ANOVA on UV sensitivity data

Anova Table (Type III tests)

Response: **UVSI**

|                    | Sum Sq | Df  | F value   | Pr(>F)        |
|--------------------|--------|-----|-----------|---------------|
| (Intercept)        | 70.998 | 1   | 4637.6131 | < 2.2e-16 *** |
| Genotype           | 0.154  | 1   | 10.0680   | 0.001712 **   |
| Treatment          | 3.792  | 3   | 82.5557   | < 2.2e-16 *** |
| Genotype:Treatment | 0.026  | 3   | 0.5627    | 0.640120      |
| Residuals          | 3.567  | 233 |           |               |

---

Signif. codes: 0 '\*\*\*' 0.001 '\*\*' 0.01 '\*' 0.05 '.' 0.1 ' ' 1  
> summary(model)

Call:

```
lm(formula = UVSI ~ Genotype + Treatment + Genotype * Treatment,  
    data = my_UVdata)
```

Residuals:

| Min      | 1Q       | Median   | 3Q      | Max     |
|----------|----------|----------|---------|---------|
| -0.24332 | -0.09597 | -0.01693 | 0.09076 | 0.47355 |

Coefficients:

|                      | Estimate  | Std. Error | t value | Pr(> t )    |
|----------------------|-----------|------------|---------|-------------|
| (Intercept)          | -0.577891 | 0.008486   | -68.100 | < 2e-16 *** |
| Genotype1            | -0.026926 | 0.008486   | -3.173  | 0.00171 **  |
| Treatment1           | 0.216133  | 0.015695   | 13.771  | < 2e-16 *** |
| Treatment2           | -0.009324 | 0.015983   | -0.583  | 0.56022     |
| Treatment3           | -0.074197 | 0.014501   | -5.117  | 6.5e-07 *** |
| Genotype1:Treatment1 | 0.006457  | 0.015695   | 0.411   | 0.68117     |
| Genotype1:Treatment2 | 0.014258  | 0.015983   | 0.892   | 0.37327     |
| Genotype1:Treatment3 | -0.008768 | 0.014501   | -0.605  | 0.54601     |

---

Signif. codes: 0 '\*\*\*' 0.001 '\*\*' 0.01 '\*' 0.05 '.' 0.1 ' ' 1

Residual standard error: 0.1237 on 233 degrees of freedom

Multiple R-squared: 0.5429, Adjusted R-squared: 0.5292

F-statistic: 39.54 on 7 and 233 DF, p-value: < 2.2e-16
