# Supplementary material
Source: publisher figshare collection journal article supplement (https://gsajournals.figshare.com/articles/dataset/_/7302002)

# Crossing scheme for the generation of the MH and MQ transgenic lines

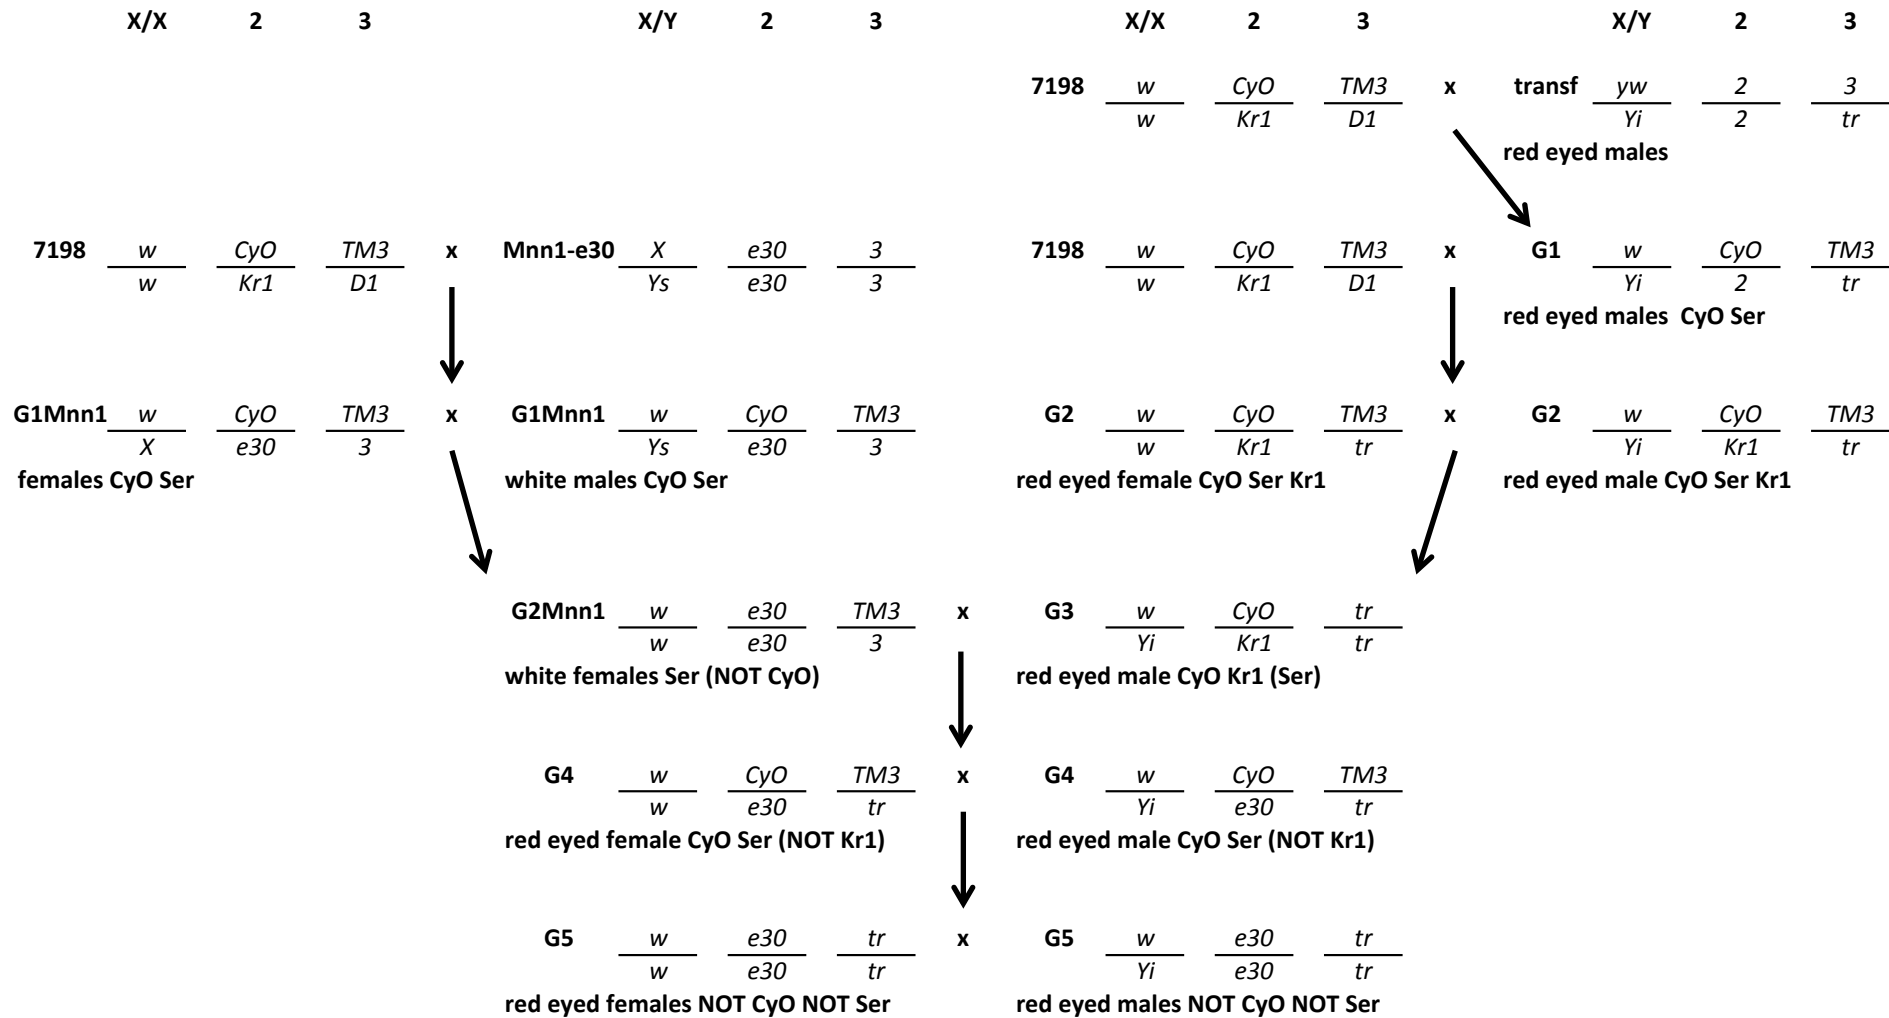

Supplement: Supplementary file 1 [file 1]
